# Supplementary material for: Evaluating the Heavy Metal Risk in Spinacia oleracea L. and Its Surrounding Soil with Varied Biochar Levels: A Pot Experiment
Source: MDPI journal article supplement (doi:10.3390/su131910843), 2021-09-29

# Supplementary Data

## Evaluating the Heavy Metal Risk in *Spinacia oleracea* L. and Its Surrounding Soil with Varied Biochar Levels: A Pot Experiment

Gang Xiang <sup>1</sup>, Xianliang Wu <sup>2</sup> and Shengxing Long <sup>1,\*</sup>

<sup>1</sup> School of Geography and Environmental Science, Guizhou Normal University, Guiyang 550025, China; xianggang76@163.com

<sup>2</sup> Guizhou Institute of Biology, Guiyang 550009, China; wuxianliang1995@163.com

\* Correspondence: longshengxing@163.com; Tel.: +86-135-9503-4820

**Table S1.** The grading standards of  $E_r^i$  and RI values.

| $E_r^i$                | RI                     | Pollution Degree |
|------------------------|------------------------|------------------|
| $E_r^i < 40$           | $RI \leq 150$          | Slight           |
| $40 \leq E_r^i < 80$   | $150 < RI < 300$       | Medium           |
| $80 \leq E_r^i < 160$  | $300 \leq RI \leq 600$ | Strong           |
| $160 \leq E_r^i < 320$ | $RI > 600$             | Very strong      |
| $E_r^i > 320$          |                        | Extremely strong |

**Table S2.** Health risk assessment exposure parameters.

| Parameters         | Implication                                                    | Adults               | Children             | References |
|--------------------|----------------------------------------------------------------|----------------------|----------------------|------------|
| BW                 | Weight /kg                                                     | 56.8                 | 19.2                 | [1]        |
| IR <sub>soil</sub> | Ingestion rate of soil / (mg/d)                                | 100                  | 200                  | [1]        |
| IR <sub>air</sub>  | Inhalation rate of soi /(m <sup>3</sup> /d)                    | 20                   | 10                   | [1]        |
| IR <sub>crop</sub> | Ingestion rate of crop /(g/d)                                  | 301.4                | 231.5                | [2]        |
| ED                 | Exposure duration/ a                                           | 25                   | 6                    | [3]        |
| EF                 | Exposure frequency/(d/a)                                       | 350                  | 350                  | [3]        |
| AF                 | Adhesion coefficient of soil to skin<br>/(mg·cm <sup>2</sup> ) | 0.07                 | 0.2                  | [3]        |
| CF                 | Conversion factor /(kg/mg )                                    | 10 <sup>-6</sup>     | 10 <sup>-6</sup>     | [3]        |
| SA                 | Skin area available for soil contact<br>/( cm <sup>2</sup> /d) | 5700                 | 2800                 | [1]        |
| PEF                | Particle emission factor /( m <sup>3</sup> /kg )               | 1.13×10 <sup>9</sup> | 1.13×10 <sup>9</sup> | [1]        |
| ABSd               | Dermal absorption factor                                       | 0.001                | 0.001                | [1]        |
| AT                 | Average time (carcinogenic risk)/d                             | 70×365               | 70×365               | [3]        |
|                    | Average time (non-carcinogenic risk)/d                         | ED×365               | ED×365               | [3]        |

1. Zhang, H.; Wang, H.; Tang, H.Y. Heavy metal pollution characteristics and health risk evaluation of soil and vegetables in various functional areas of lead-zinc tailings pond. *Acta Scientiae Circumstantiae* 2020, 40(3), 1085-1094. (In Chinese).
2. Feng, Y.J.; Zhao, Q.L.; Sun, H.X. Assessment of soil-vegetable contamination and health risk of heavy metals in vegetables around North China. *Journal of Agricultural University of Hebei* 2017, 40, 1-7. (In Chinese).
3. U.S. EPA. Exposure Factors Handbook 2011 Edition (Final Report). U.S. Environmental Protection Agency, Washington, DC, EPA/600/R-09/052F, 2011.

**Table S3.** Model parameters RfD and SF values.

| Routes         | Parameters | Cd                   | Cu                   | Ni                    | Zn                    | Pb                    | As                    |
|----------------|------------|----------------------|----------------------|-----------------------|-----------------------|-----------------------|-----------------------|
| Dermal contact | RfD        | $1 \times 10^{-3}$   | $1.9 \times 10^{-3}$ | $5.40 \times 10^{-3}$ | $6.00 \times 10^{-3}$ | $3.52 \times 10^{-3}$ | $3.00 \times 10^{-4}$ |
|                | SF         | 6.1                  |                      |                       |                       |                       | 1.5                   |
| Ingestion-soil | RfD        | $1 \times 10^{-3}$   | $3.7 \times 10^{-2}$ | $2.00 \times 10^{-2}$ | $3.0 \times 10^{-1}$  | $3.50 \times 10^{-3}$ | $3.00 \times 10^{-4}$ |
|                | SF         | 6.1                  |                      |                       |                       |                       | 1.5                   |
| Inhale-soil    | RfD        | $1 \times 10^{-3}$   | $4.2 \times 10^{-2}$ | $2.06 \times 10^{-2}$ | $3.0 \times 10^{-1}$  | $5.25 \times 10^{-3}$ | $1.23 \times 10^{-4}$ |
|                | SF         | $1.8 \times 10^{-3}$ |                      | $8.4 \times 10^{-1}$  |                       |                       | $4.30 \times 10^{-3}$ |
| Oral-crop      | RfD        | $1 \times 10^{-3}$   | $4.0 \times 10^{-2}$ | $2.00 \times 10^{-2}$ | $3.0 \times 10^{-1}$  | $4.00 \times 10^{-3}$ | $3.00 \times 10^{-4}$ |
|                | SF         | $3.8 \times 10^{-3}$ |                      |                       |                       | $8.50 \times 10^{-3}$ | 1.5                   |

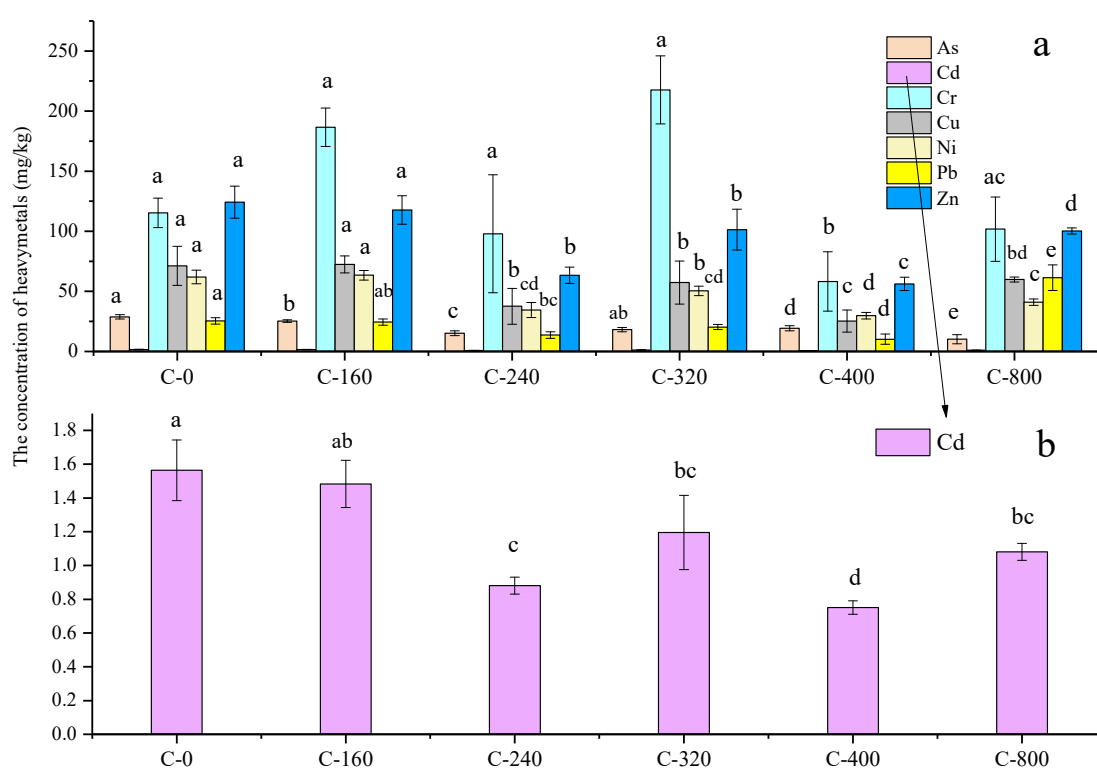

Supplement: s1 [file s1]
